# Supplementary material for: Encephalitis in Patients with COVID-19: A Systematic Evidence-Based Analysis
Source: MDPI journal article supplement (doi:10.3390/cells11162575), 2022-08-18
Supplement: s1 [file s1]

**Table S1.** Search strategies

| <b>Databases</b>      | <b>Search strategies</b>                                                                                                                                                  |
|-----------------------|---------------------------------------------------------------------------------------------------------------------------------------------------------------------------|
| <b>PubMed</b>         | (Coronavirus[Title] OR COVID-19[Title] OR COVID19[Title] OR nCoV[Title] OR SARS-CoV-2[Title] OR SARS-CoV2[Title]) AND (encephalitis[Title])<br>Year restriction 2019-2022 |
| <b>Scopus</b>         | TITLE(Coronavirus OR COVID-19 OR COVID19 OR nCoV OR SARS-CoV-2 OR SARS-CoV2) AND TITLE(encephalitis)<br>Year restriction 2019-2022                                        |
| <b>Google Scholar</b> | allintitle: ("Coronavirus" OR "COVID-19" OR "COVID19" OR "nCoV" OR "SARS-CoV-2" OR "SARS-CoV2") ("encephalitis")<br>Year restriction 2019-2022                            |

Table S2. Laboratory features of encephalitis patients with SARS-Cov-2 infection

| No. | Study ID         | Leukocyte types                                     | Opening pressure<br>when performing<br>lumbar puncture (Ref:<br>100–200 mm H <sub>2</sub> O) | Serum blood<br>glucose value | IgG index |
|-----|------------------|-----------------------------------------------------|----------------------------------------------------------------------------------------------|------------------------------|-----------|
| 1   | Ahsan 2021       | <b>Hospital Admission 1</b>                         | NR                                                                                           | NR                           | 0.55      |
|     |                  | WBC 132 cells/mm <sup>3</sup>                       |                                                                                              |                              |           |
|     |                  | Lymphocytes 64%                                     |                                                                                              |                              |           |
|     |                  | <b>Hospital Admission 2 (+7d)</b>                   |                                                                                              |                              |           |
|     |                  | WBC 116 cells/mm <sup>3</sup>                       |                                                                                              |                              |           |
| 2   | Allahyari 2021   | WBC 13900, Neutrophils: 87%,                        | NR                                                                                           | NR                           | NR        |
|     |                  | Lymphocytes: 10%                                    |                                                                                              |                              |           |
| 3   | Andrea 2020      | NR                                                  | NR                                                                                           | NR                           | NR        |
| 4   | Ayatollahi 2020  | Increased WBC (20 cells/uL, 100% lymphocytes)       | 150 mm                                                                                       | Normal                       | NR        |
| 5   | Ayuningtyas 2022 | Leukocytes 17900/UL, Neutrophils: 84%               | NR                                                                                           | 104 mg/dl                    | NR        |
|     |                  | Lymphocytes: 10.1%                                  |                                                                                              |                              |           |
| 6   | Ayuso 2020       | 0/mm <sup>3</sup>                                   | NR                                                                                           | NR                           | 0.5       |
| 7   | Babar 2020       | NR                                                  | NR                                                                                           | NR                           | NR        |
| 8   | Benameur 2020    | Neutrophils: 51% (0%–6%) Lymphocytes: 10% (40%–80%) | 300 mm                                                                                       | NR                           | NR        |
|     |                  | Macrophages: 39% (15%–45%)                          |                                                                                              |                              |           |
|     |                  | Neutrophils: 75% (0%–6%)                            | 480 mm                                                                                       |                              |           |

|         |                           |                                                                                                                                              |        |           |                                                                 |
|---------|---------------------------|----------------------------------------------------------------------------------------------------------------------------------------------|--------|-----------|-----------------------------------------------------------------|
|         |                           | Lymphocytes: 25% (40%–80%)<br>Macrophages: 0% (15%–45%)<br>Neutrophils: 0% (0%–6%)<br>Lymphocytes: 0% (40%–80%)<br>Macrophages: 0% (15%–45%) | 120 mm |           |                                                                 |
| 9       | Bernard-Valnet 2020       | Lymphocytes: 97%                                                                                                                             | NR     | NR        | NR                                                              |
|         |                           | Lymphocytes: 89%                                                                                                                             |        |           |                                                                 |
| 10      | Bhavsar 2020              | Increased WBC (122 cells/uL) with mononuclear cells predominance                                                                             | NR     | 109 mg/dL | NR                                                              |
|         |                           | Lymphocytic pleocytosis (95 cells/uL, 98% lymphocytes, 2% macrophages)                                                                       |        |           |                                                                 |
| 11      | Bodro 2020                | Lymphocytic pleocytosis                                                                                                                      | NR     | NR        | NR                                                              |
| 12      | Burr 2021                 | WBC 7 cells/mL (89% lymphocytes and 11% monocytes)                                                                                           | NR     | 105 mg/dL | NR                                                              |
| 13      | Cao 2020                  | NR                                                                                                                                           | NR     | NR        | NR                                                              |
| 14      | Casez 2021                | WBC 8 cells/mm <sup>3</sup> (75% polymorphonuclear neutrophilic cells)                                                                       | NR     | NR        | NR                                                              |
| 15      | Chalil 2020               | Nucleated cells: 76 x 10 <sup>6</sup> /L (65% neutrophils)                                                                                   | NR     | NR        | IgG ratio 0.35 (Ref: 0-0.23)<br>IgG index 1.05 (Ref: 0.25-0.85) |
| 16      | Cheraghali 2021           | WBC 14700 cells/μl, Lymphocytes: 20%                                                                                                         | NR     | NR        | NR                                                              |
| 17      | Dahshan 2022              | NR                                                                                                                                           | NR     | NR        | NR                                                              |
| 18      | Dono 2021                 | Lymphocytosis (26 cells/mm <sup>3</sup> )                                                                                                    | NR     | NR        | NR                                                              |
| 19 & 20 | Duong 2020 and Huang 2020 | 100% lymphocytes                                                                                                                             | NR     | 200 mg/dL | NR                                                              |

|    |                     |                                                                   |        |                 |          |
|----|---------------------|-------------------------------------------------------------------|--------|-----------------|----------|
| 21 | Durovic 2021        | NR                                                                | NR     | NR              | NR       |
| 22 | Efe 2020            | NR                                                                | NR     | NR              | NR       |
| 23 | El Aoud 2021        | WBC 1 cell/mm <sup>3</sup>                                        | NR     | NR              | NR       |
| 24 | Elmouhib 2022       | Lymphocytes 360 cells/uL                                          | NR     | 112 mg/dl       | NR       |
| 25 | Esmaeili 2022       | Lymphopenia                                                       | NR     | NR              | NR       |
| 26 | Etemadifar 2020     | NR                                                                | NR     | NR              | NR       |
| 27 | Ferdosian 2021      | WBC 14000/mm <sup>3</sup> , Neutrophils:71%,<br>Lymphocytes: 21%  | NR     | NR              | NR       |
| 28 | Freire-Álvarez 2020 | Leukocyte 20 cells/mL (90% lymphocytes)                           | NR     | NR              | NR       |
| 29 | Gaughan 2021        | Normal WBCs and lymphocyte<br>count                               | NR     | NR              | NR       |
| 30 | Ghosh 2020          | Mild lymphocytosis (total 20 cells,<br>including 90% lymphocytes) | NR     | NR              | Elevated |
| 31 | Grimaldi 2020       | NR                                                                | NR     | NR              | NR       |
| 32 | Gunawardhana 2021   | NR                                                                | NR     | Normal          | NR       |
| 33 | Haider 2020         | WBC 3 cells/mm <sup>3</sup>                                       | 150 mm | NR              | NR       |
| 34 | Hassan 2021         | Increased Leukocyte count, High Neutrophils                       | NR     | NR              | NR       |
| 35 | Hayashi 2020        | NR                                                                | NR     | NR              | NR       |
| 36 | Kahwagi 2021        | NR                                                                | NR     | NR<br>182 mg/dL | NR       |
| 37 | Kamal 2020          | WBC <5 cells/mm <sup>3</sup>                                      | NR     | 88 mg/dL        | NR       |
| 38 | Kasturiarachi 2022  | Lymphocytes: 51%                                                  | NR     | 104 mg/dl       | NR       |

|                    |                         |                                                          |         |           |                                     |
|--------------------|-------------------------|----------------------------------------------------------|---------|-----------|-------------------------------------|
| Neutrophils: 46.1% |                         |                                                          |         |           |                                     |
| Monocytes: 1%      |                         |                                                          |         |           |                                     |
| Eosinophils: 1.9%  |                         |                                                          |         |           |                                     |
| 39                 | Khoo 2020               | WBC 1 cell/mm <sup>3</sup>                               | NR      | NR        | NR                                  |
| 40                 | Kimura 2021             | NR                                                       | NR      | NR        | NR                                  |
| 41                 | Koh 2022                | NR                                                       | NR      | NR        | NR                                  |
| 42                 | Kumar 2020              | NR                                                       | NR      | NR        | NR                                  |
| 43                 | Kumar 2022              | NR                                                       | NR      | NR        | NR                                  |
| 44                 | Marques 2022            | NR                                                       | 170 mm  | NR        | NR                                  |
| 45                 | McAbee 2020             | 16 WBCs, Neutrophils: 8% (0%-6%)                         | NR      | NR        | NR                                  |
| 46                 | Mekheal 2022            | WBC: 10.8x10 <sup>3</sup> cells/mm <sup>3</sup>          | NR      | NR        | NR                                  |
| 47                 | Mierzewska-Schmidt 2022 | Lymphocytes: 42%                                         | NR      | 149 mg/dl | NR                                  |
|                    |                         | Neutrophils: 52%                                         |         |           |                                     |
| 48                 | Miqdad 2021             | WBC: 302 cells/uL, Lymphocytes: 85%,<br>Neutrophils: 15% | NR      | NR        | NR                                  |
| 49                 | Monti 2020              | WBC 76 (type NR)                                         | NR      | NR        | IgG link index<br>1.45 (Ref: <0.70) |
| 50                 | Moriguchi 2020          | WBC 12 cells/mL                                          | >320 mm | NR        | NR                                  |
| 51                 | Morvan 2020             | 0 leucocytes                                             | NR      | NR        | NR                                  |
| 52                 | Mullaguri 2021          | Lymphocytes: 23300 cells/mm <sup>3</sup> (83%)           | NR      | NR        | NR                                  |
| 53                 | Natarajan 2020          | WBC 200 cells/mm <sup>3</sup> , all lymphocytes          | NR      | 126 mg/dL | NR                                  |
| 54                 | Oosthuizen 2021         | NR                                                       | NR      | NR        | NR                                  |

|    |                        |                                                                                                                                           |       |             |    |
|----|------------------------|-------------------------------------------------------------------------------------------------------------------------------------------|-------|-------------|----|
| 55 | Orsini 2021            | Lymphocytes: 50%                                                                                                                          | NR    | NR          | NR |
|    |                        | Monocytes: 12%                                                                                                                            |       |             |    |
|    |                        | Neutrophils: 4%                                                                                                                           |       |             |    |
| 56 | Panariello 2020        | NR                                                                                                                                        | NR    | NR          | NR |
| 57 | Picod 2020             | NR                                                                                                                                        | NR    | NR          | NR |
| 58 | Pilotto 2020           | Mild lymphocytic pleocytosis (18/μl)                                                                                                      | NR    | NR          | NR |
| 59 | Pizzanelli 2021        | Normal WBC count                                                                                                                          | NR    | NR          | NR |
| 60 | Poursadeghfard 2021    | NR                                                                                                                                        | NR    | NR          | NR |
| 61 | Rebeiz 2020            | Lymphocytic pleocytosis with WBC 350 cells/μl, 98% mononuclear cells.                                                                     | NR    | NR          | NR |
| 62 | Reddy 2021             | WBC 1 cell/uL                                                                                                                             | NR    | NR          | NR |
| 63 | Sangare 2020           | NR                                                                                                                                        | NR    | NR          | NR |
| 64 | Sarmast 2022           | NR                                                                                                                                        | NR    | NR          | NR |
| 65 | Sattar 2020            | Total nucleated cells count 11; eosinophil 1%, segmented neutrophils 75%, lymphocytes 21%, monocytes/macrophages 3% with mild pleocytosis | NR    | NR          | NR |
| 66 | Sharma 2022            | Case 1: WBC: 15470 cells/mm <sup>3</sup>                                                                                                  | NR    | NR          | NR |
|    |                        | Case 2: WBC: 12000 cells/mm <sup>3</sup>                                                                                                  |       |             |    |
|    |                        | Case 3: WBC: 9940 cells/mm <sup>3</sup> (Neutrophils: 80%)                                                                                |       |             |    |
| 67 | Sofijanova 2020        | NR                                                                                                                                        | NR    | 242.3 mg/dL | NR |
| 68 | Svedung Wettervik 2020 | Increase in leukocytes (21 x 10 <sup>6</sup> /L polynuclear and 25 x 10 <sup>6</sup> /L mononuclear)                                      | NR    | NR          | NR |
| 69 | Tee 2022               | NR                                                                                                                                        | 95 mm | NR          | NR |
| 70 | Vandervorst 2020       | NR                                                                                                                                        | NR    | NR          | NR |
| 71 | Woldie 2020            | NR                                                                                                                                        | NR    | NR          | NR |

|    |                       |                             |        |    |      |
|----|-----------------------|-----------------------------|--------|----|------|
| 72 | Urso 2022             | NR                          | NR     | NR | NR   |
| 73 | Valadez-Calderon 2022 | NR                          | NR     | NR | NR   |
| 74 | Ye 2020               | WBC 1 cell/mm <sup>3</sup>  | 220 mm | NR | NR   |
| 75 | Zambreanu 2020        | WBC 3 cells/mm <sup>3</sup> | NR     | NR | 0.48 |
| 76 | Zandifar 2020         | 11 WBC                      | NR     | NR | NR   |
|    |                       | 9 WBC                       |        |    |      |
| 77 | Zanin 2021            | NR                          | NR     | NR | NR   |
| 78 | Zlotnik 2022          | NR                          | NR     | NR | NR   |
| 79 | Zuhorn 2020           | 9 WBC (88% Lymphocytes)     | NR     | NR | NR   |

**Table S3.** Quality assessment of the included case reports

[illegible]



[illegible]

|    |                        |   |   |   |   |    |    |    |   |      |
|----|------------------------|---|---|---|---|----|----|----|---|------|
| 64 | Sattar 2020            | Y | Y | Y | Y | Y  | Y  | N  | Y | 87.5 |
| 65 | Sofijanova 2020        | Y | N | Y | Y | N  | Y  | N  | Y | 62.5 |
| 66 | Svedung Wettervik 2020 | Y | Y | Y | Y | Y  | N  | N  | Y | 87.5 |
| 67 | Tee 2022               | Y | Y | Y | Y | Y  | Y  | N  | N | 75.0 |
| 68 | Urso 2022              | Y | Y | Y | Y | NA | NA | NA | N | 80.0 |
| 69 | Valadez-Calderon 2022  | Y | Y | Y | Y | Y  | U  | N  | Y | 75.0 |
| 70 | Vandervorst 2020       | Y | Y | Y | Y | Y  | Y  | N  | Y | 87.5 |
| 71 | Woldie 2020            | Y | Y | Y | Y | Y  | U  | N  | Y | 75.0 |
| 72 | Ye 2020                | Y | N | Y | Y | Y  | Y  | N  | Y | 75.0 |
| 73 | Zambreanu 2020         | Y | N | Y | Y | Y  | Y  | N  | Y | 75.0 |
| 74 | Zanin 2021             | Y | Y | Y | U | Y  | Y  | Y  | Y | 87.5 |
| 75 | Zuhorn 2020            | Y | Y | Y | U | Y  | Y  | N  | Y | 75.0 |

1. Were patient's demographic characteristics clearly described? 2. Was the patient's history clearly described and presented as a timeline? 3. Was the current clinical condition of the patient on presentation clearly described? 4. Were diagnostic tests or assessment methods and the results clearly described? 5. Was the intervention(s) or treatment procedure(s) clearly described? 6. Was the post-intervention clinical condition clearly described? 7. Were adverse events (harms) or unanticipated events identified and described? 8. Does the case report provide takeaway lessons?

**Table S4.** Quality assessment of the included case series

| No. | Study ID      | Quality assessment checklist for case series |   |   |   |   |   |   |   |   |    | Yes (%) |
|-----|---------------|----------------------------------------------|---|---|---|---|---|---|---|---|----|---------|
|     |               | 1                                            | 2 | 3 | 4 | 5 | 6 | 7 | 8 | 9 | 10 |         |
| 1   | Benameur 2020 | Y                                            | N | Y | Y | Y | Y | Y | Y | N | U  | 70.0    |
| 2   | Cao 2020      | Y                                            | Y | Y | N | Y | Y | Y | Y | N | N  | 70.0    |
| 3   | Sharma 2022   | Y                                            | Y | Y | Y | Y | Y | Y | Y | U | Y  | 90.0    |
| 4   | Zandifar 2020 | Y                                            | N | Y | N | Y | Y | Y | Y | N | N  | 60.0    |

1. Were there clear criteria for inclusion in the case series? 2. Was the condition measured in a standard, reliable way for all participants included in the case series? 3. Were valid methods used for identification of the condition for all participants included in the case series? 4. Did the case series have consecutive inclusion of participants? 5. Did the case series have complete inclusion of participants? 6. Was there clear reporting of the demographics of the participants in the study? 7. Was there clear reporting of clinical information of the participants? 8. Were the outcomes or follow up results of cases clearly reported? 9. Was there clear reporting of the presenting site(s)/clinic(s) demographic information? 10. Was statistical analysis appropriate?
